# Supplementary material
Source: PubMed Central journal article supplement (PMC8011841)
Supplement: NIHMS1630775-supplement-Ref__permission_not_needed.pdf [file NIHMS1630775-supplement-Ref__permission_not_needed.pdf]

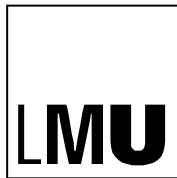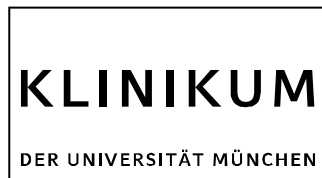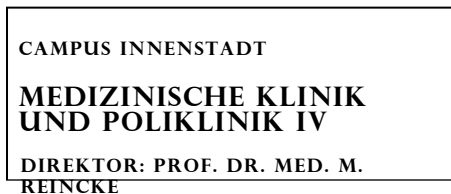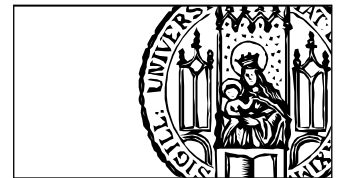

Klinikum der Universität München · Medizinische Klinik und Poliklinik IV  
Direktion · Ziemssenstr.1 · 80336 München

Dr. Tracy Ann Williams

Telefon +49 (0)89 4400 - 52941  
Telefax +49 (0)89 4400 - 54428  
Tracy.Williams@ med.uni-muenchen.de  
[www.klinikum.uni-muenchen.de](http://www.klinikum.uni-muenchen.de)

**MS ID#: HYPE/2020/15998\_R1**

**MS TITLE: Effect of dietary sodium modulation on pig adrenal steroidogenesis and transcriptome profiles**

Munich, 17th September 2020

Dear Professor Carey,

We are happy to re-submit our manuscript by Vohra et al entitled „Effect of dietary sodium modulation on pig adrenal steroidogenesis and transcriptome profiles“.

We have addressed all style issues:

- parenthesis has been removed in figures 1, 2 and 4
- we have sent the graphical abstract as a JPEG file at 300 dpi
- highlighted text has been removed from the main manuscript and from the online supplement
- the font size in the table has been changed to 12 pt
- **the legend to table S2 cites references which described the first production of the indicated antibody. No material has been reproduced or reprinted and therefore, permission is not required**
- the references in the supplemental file have been carefully checked and they adhere to requirements:

Supplemental ref. 1 is ref. 20 in the main text  
Supplemental ref. 2 is ref. 21 in the main text  
Supplemental ref. 3 is ref. 22 in the main text  
Supplemental ref. 4 is ref. 23 in the main text  
Supplemental ref. 5 is ref. 24 in the main text  
Supplemental ref. 6 is ref. 25 in the main text  
Supplemental ref. 7 is ref. 26 in the main text  
Supplemental ref. 8 is ref. 27 in the main text  
Supplemental ref. 9 is ref. 28 in the main text

Thank you very much for handling our manuscript.

With kind regards,

*Tracy Ann Williams*

Tracy Ann Williams

---

DIREKTOR/-IN DER KLINIK: PROF. DR. MED. MARTIN REINCKE

DAS KLINIKUM DER UNIVERSITÄT MÜNCHEN IST EINE ANSTALT DES ÖFFENTLICHEN RECHTS

VORSTAND: ÄRZTLICHER DIREKTOR: PROF. DR. MED. KARL-WALTER JAUCH (VORSITZ), KAUFMÄNNISCHER DIREKTOR: MARKUS ZENDLER  
STELLVERTRETER DES PFLEGEDIREKTORS: ALFRED HOLDERIED, VERTRETER DER MEDIZINISCHEN FAKULTÄT: PROF. DR. MED. DENT. REINHARD HICKEL  
(DEKAN)

INSTITUTIONSKENNZEICHEN: 260 914 050, UMSATZSTEUER-IDENTIFIKATIONSNUMMER GEMÄSS §27A UMSATZSTEUERGESETZ: DE813536017
